# Supplementary material for: Comparing the efficacy of γ- and electron-irradiation of PBMCs to promote secretion of paracrine, regenerative factors
Source: PubMed Central journal article supplement — Mol Ther Methods Clin Dev. 2021 Feb 24;21:14–27. doi: 10.1016/j.omtm.2021.02.016 (PMC7960502; doi:10.1016/j.omtm.2021.02.016), 2021-02-24
Supplement: mmc1.pdf [file mmc1.pdf]

**OMTM, Volume 21**

**Supplemental information**

**Comparing the efficacy of  $\gamma$ - and electron-  
irradiation of PBMCs to promote secretion  
of paracrine, regenerative factors**

**Maria Laggner, Alfred Gugerell, Dragan Copic, Markus Jeitler, Michael Springer, Anja Peterbauer, Christopher Kremslehner, Manuel Filzwieser-Narzt, Florian Gruber, Sibylle Madlener, Michael Erb, Joachim Widder, Wolfgang Lechner, Dietmar Georg, Michael Mildner, and Hendrik Jan Ankersmit**

## Supplemental Figures

**Figure S1. Gene enrichment analysis of genes differentially expressed between  $\gamma$ - and electron irradiation.**

**A**

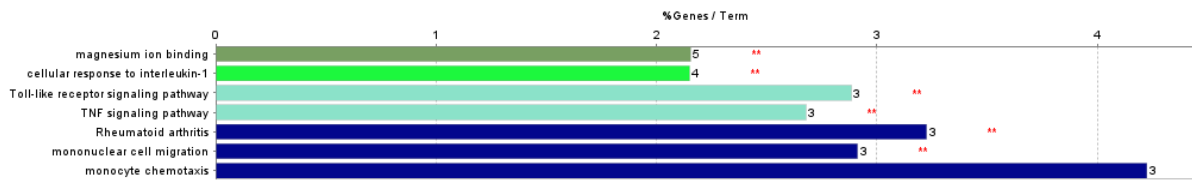

**B**

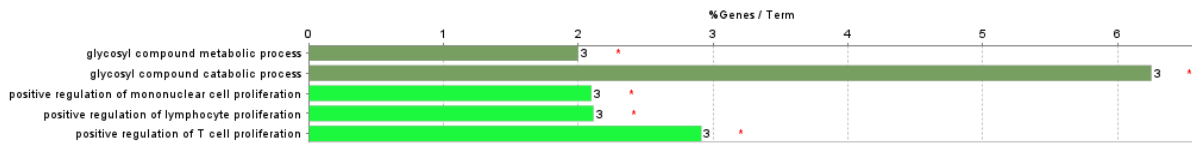

Figure S1. Gene ontologies (GO) associated with genes expressed in (A)  $\gamma$ -irradiated PBMCs and (B) electron-irradiated PBMCs. Numbers next to bars indicate absolute number of genes involved per term. Numbers on x-axes indicate relative amount of genes enriched per term. Asterisks indicate statistical significance. Color codes indicate families of GO terms.

**Figure S2. DNA damage response of electron- and  $\gamma$ -irradiated human PBMCs.**

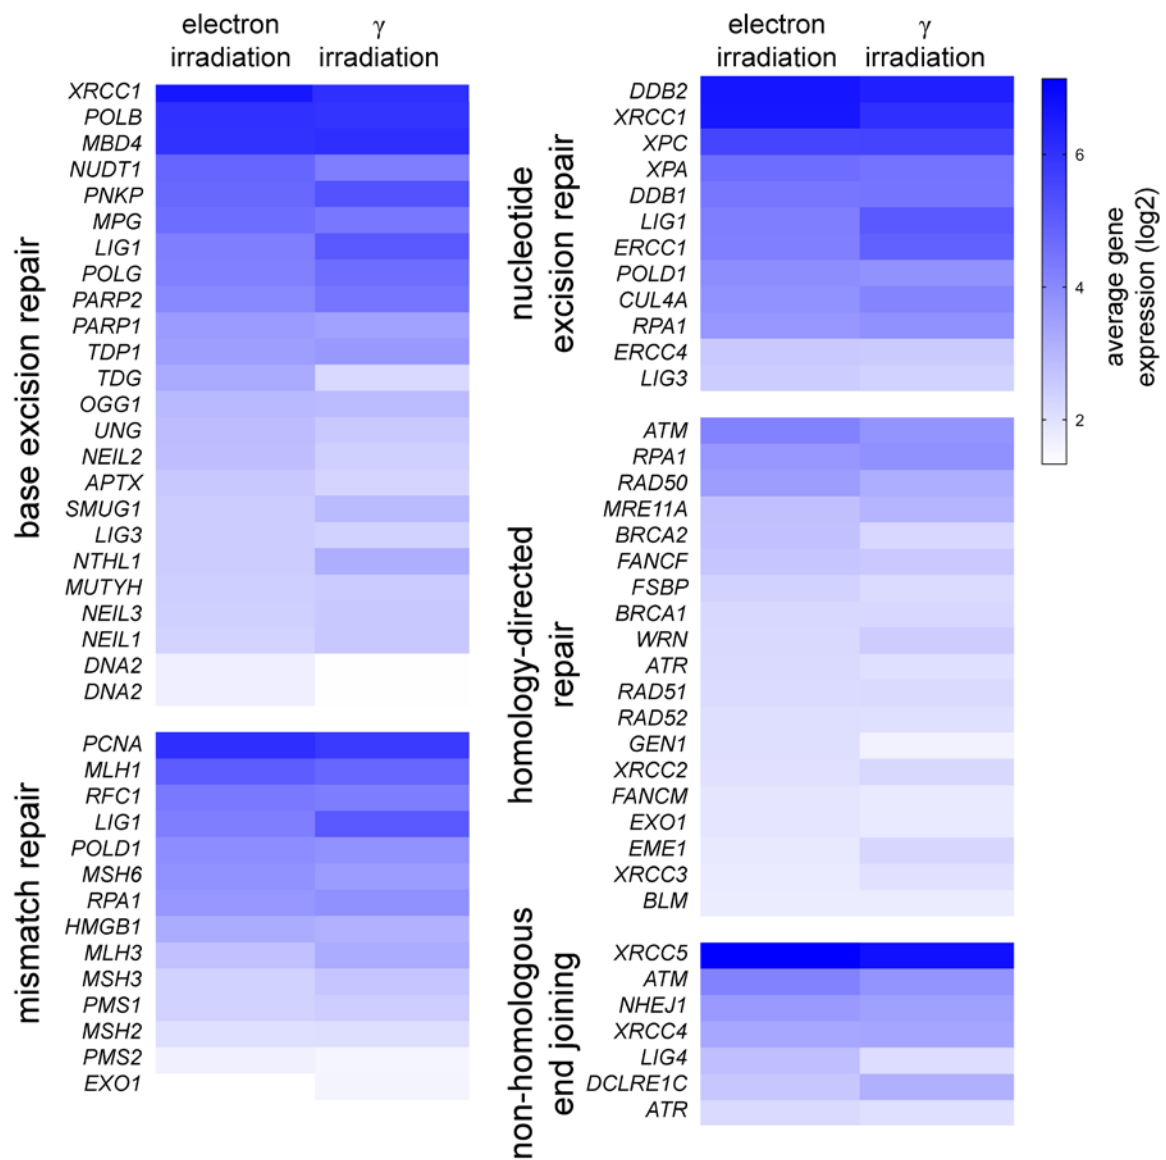

Figure S2. Expression values of genes associated with DNA damage repair. Colors indicate log<sub>2</sub>-transformed gene expression values as indicated in the color legend. Genes implicated in different processes of DNA damage repair were analyzed.

**Figure S3. Semi-quantitative protein analysis of secretomes obtained from  $\gamma$ - and electron-irradiated PBMCs.**

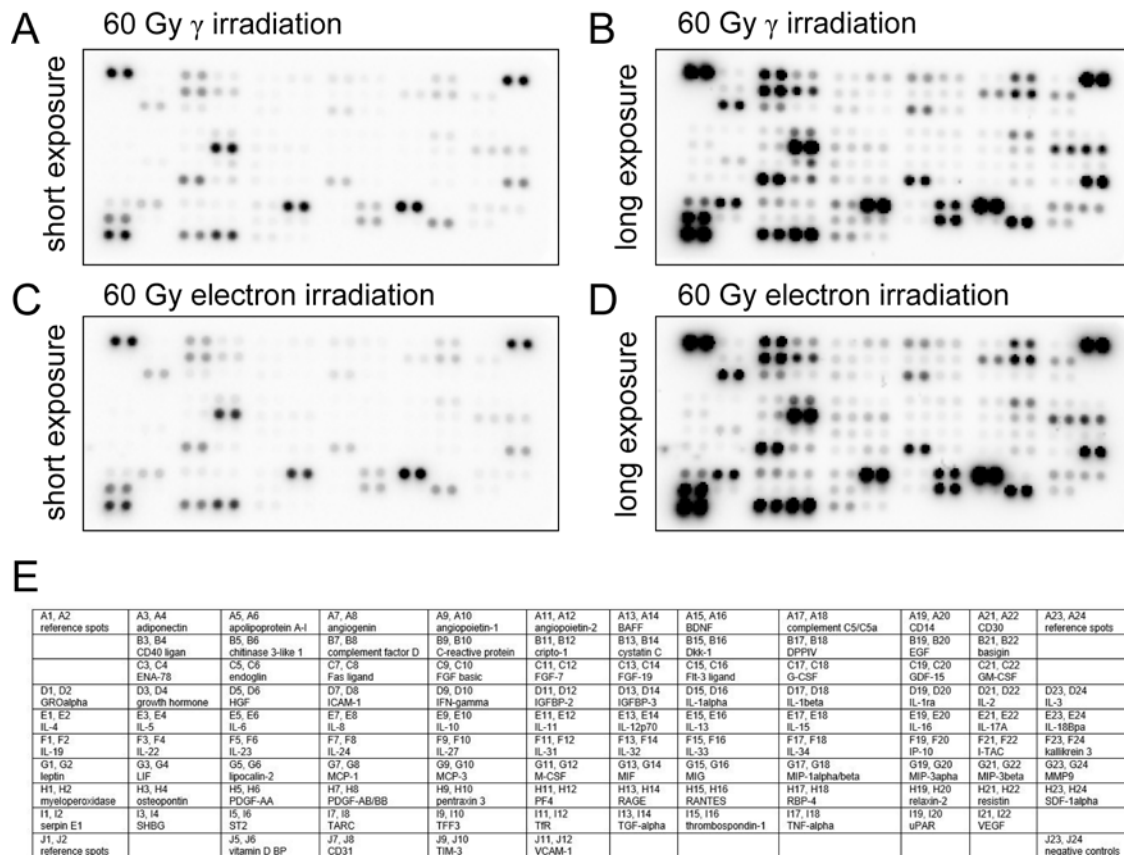

Figure S3. Proteome profiler of secretomes obtained from  $\gamma$ - and electron-irradiated PBMCs. We used a commercially available kit (Human XL Cytokine Array Kit Proteome Profiler, R&D Systems) to analyze cytokines present in secretomes. For (A & B)  $\gamma$ - and (C & D) electron irradiation, short and long exposures of chemiluminescent signals are shown. For short and long exposures, images were acquired after 30 seconds and 600 seconds exposure, respectively. Each dot represents one analyte spotted in duplicates. (E) Coordinates of all analytes present on each membrane. Dots are marked from 1 to 24 from left to right and from A to J from top to bottom.

**Figure S4. Calibration data of the linear accelerator.**

The electron beam was calibrated to deliver 1 Gy/ 100 Monitor units at the depth of maximum dose using a source to surface distance of 100 cm and a 10 cm x 10 cm applicator. For these experiments, a 20 cm x 20 cm applicator was used and the Linac output was corrected for the applicator-specific output factor of 1.024. Regular, machine-specific quality assurance guaranteed a symmetry and a flatness of the lateral dose profile of less than 2% and 5%, respectively. A lateral dose profile of the employed electron beam is depicted in figure S4.

| CAX Dev. [mm] | Field Size [cm] | Flatness [%] | Symmetry [%] | Max.Dose Ratio | Field Size at SID [cm] | SSD [cm] | Field Size [cm x cm] | Curve Type | Depth [mm] |
|---------------|-----------------|--------------|--------------|----------------|------------------------|----------|----------------------|------------|------------|
| 0,57          | 21,389          | 104,87       | 100,80       | 1,004          | 21,094                 | 100,0    | 20,0 x 20,0          | Y Profile  | 14,00      |

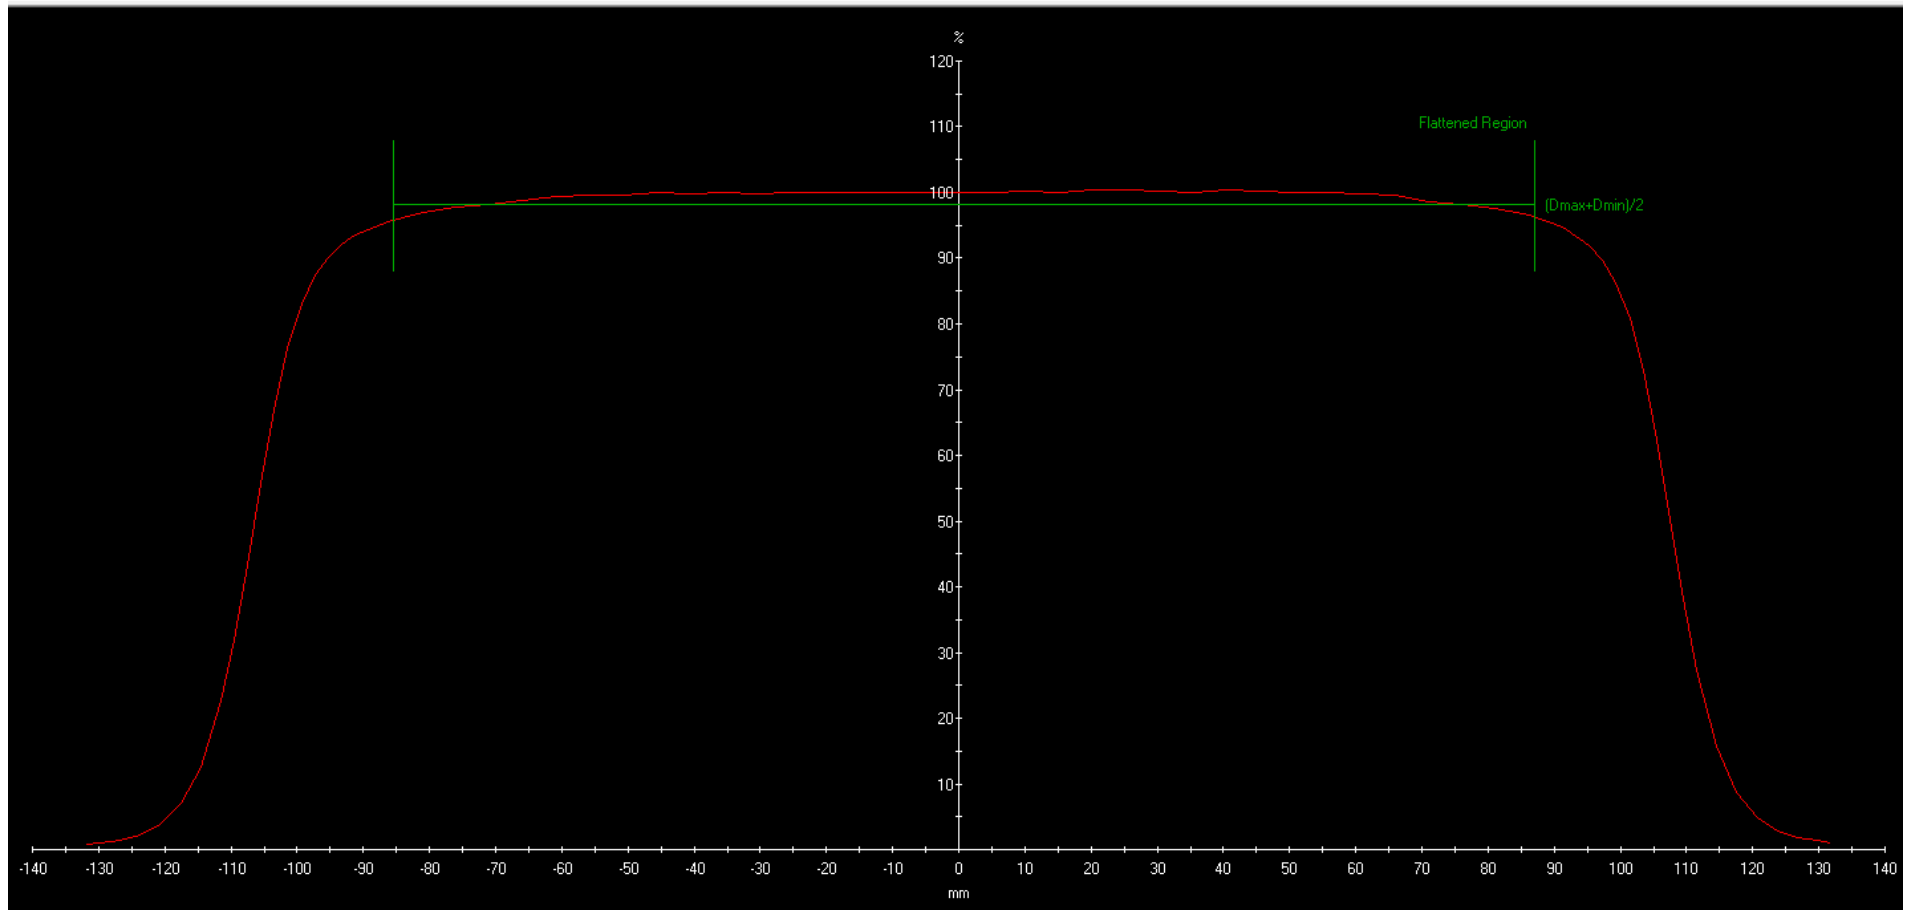

Figure S4. A lateral dose profile of a 6 MeV electron beam.

**Figure S5. RNA quality control.**

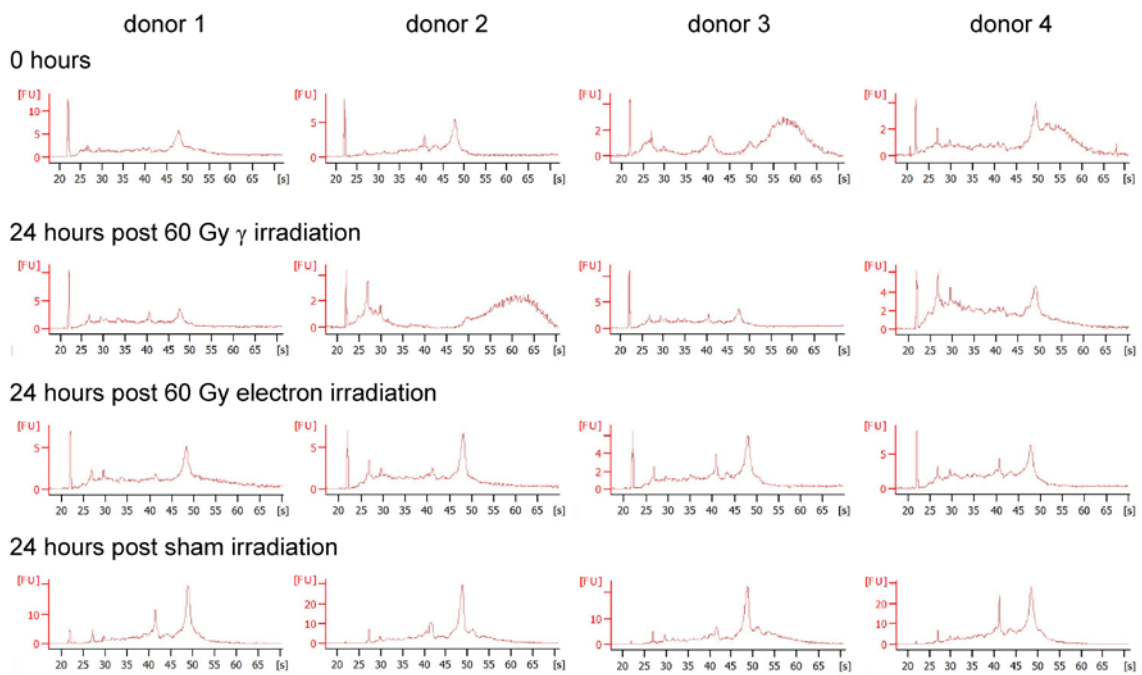

Figure S5. RNA quality of electron- and  $\gamma$ -irradiated human PBMCs of 4 donors. RNA quality was assessed by Agilent 2100 Bioanalyzer.

**Figure S6. Quality control of EV-derived small RNAs.**

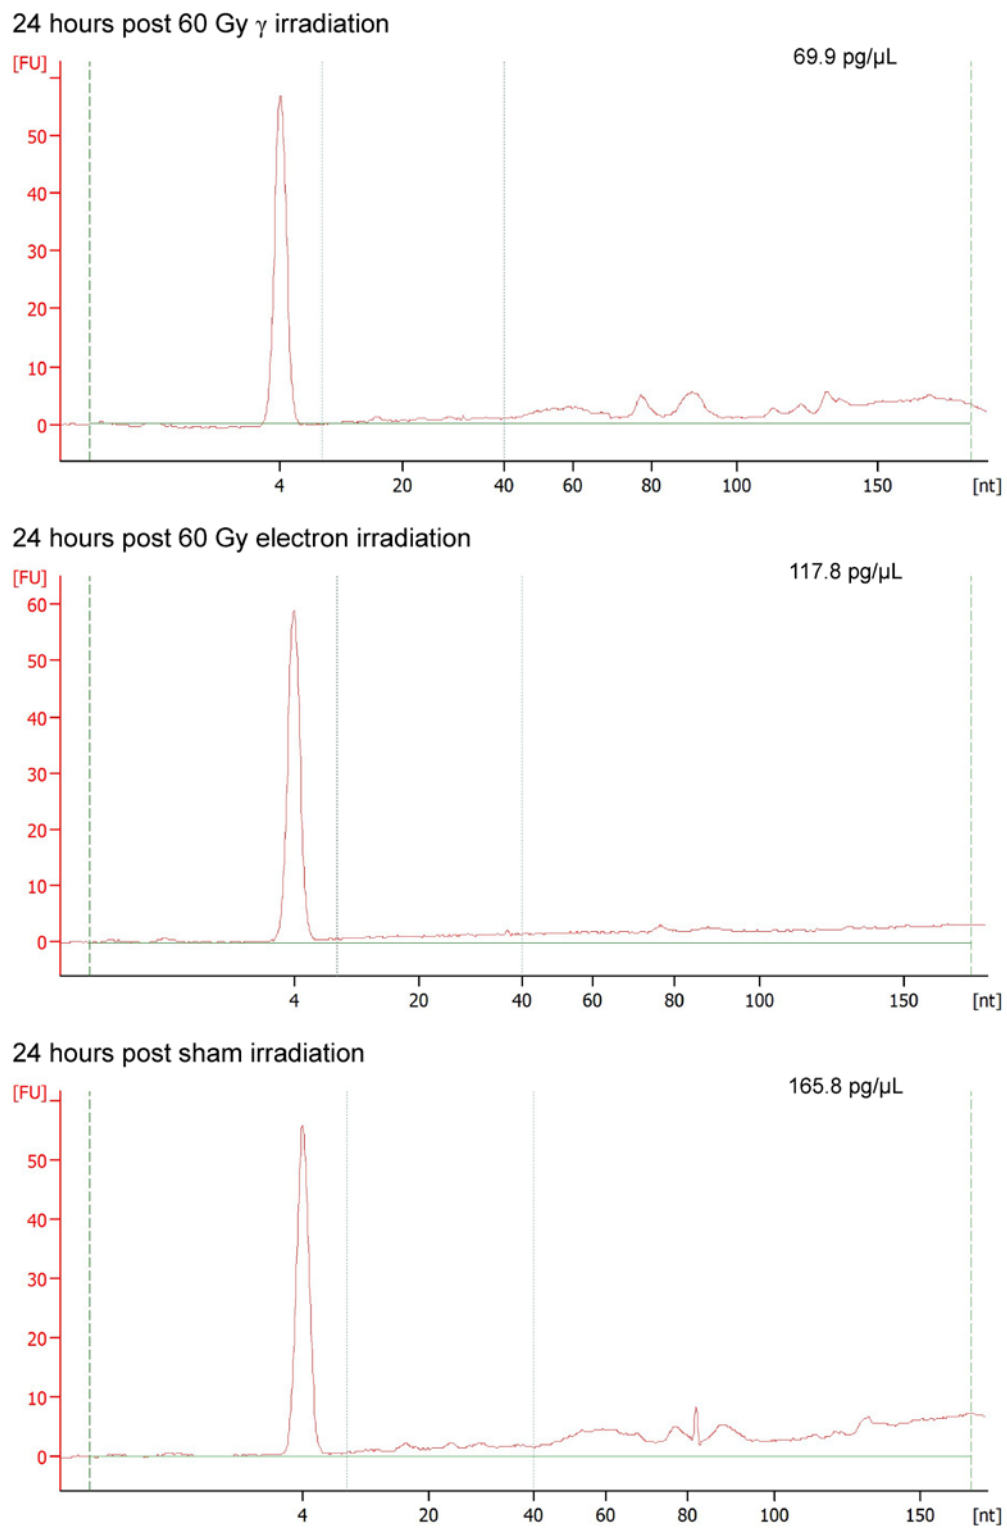

Figure S6. Quality of small RNAs present in PBMC-derived EVs. A pool of  $n = 6$  donors was analysed. RNA quality was assessed by Agilent 2100 Bioanalyzer. Numbers indicate RNA concentrations.



Supplemental Tables

Table S1. MicroRNA species present in the EVs of  $\gamma$ - and electron-irradiated PBMCs. Numbers indicate UMIs.

| miRNA           | 60 Gy $\gamma$ irradiation | 60 Gy electron irradiation | miRNA             | 60 Gy $\gamma$ irradiation | 60 Gy electron irradiation | miRNA            | 60 Gy $\gamma$ irradiation | 60 Gy electron irradiation |
|-----------------|----------------------------|----------------------------|-------------------|----------------------------|----------------------------|------------------|----------------------------|----------------------------|
| hsa-miR-16-5p   | 4 686                      | 2 373                      | hsa-miR-146b-5p   | 73                         | 27                         | hsa-miR-1469     | 26                         | 33                         |
| hsa-miR-150-5p  | 3 129                      | 1 630                      | hsa-miR-4767      | 72                         | 151                        | hsa-miR-6865-5p  | 26                         | 26                         |
| hsa-miR-223-3p  | 2 638                      | 1 364                      | hsa-miR-24-3p     | 72                         | 69                         | hsa-miR-99b-5p   | 26                         |                            |
| hsa-miR-142-3p  | 1 766                      | 589                        | hsa-miR-320b      | 68                         | 61                         | hsa-miR-3666     | 25                         | 70                         |
| hsa-miR-423-5p  | 1 144                      | 980                        | hsa-miR-663a      | 65                         | 77                         | hsa-miR-432-5p   | 25                         |                            |
| hsa-miR-26a-5p  | 1 047                      | 400                        | hsa-miR-4508      | 65                         | 57                         | hsa-miR-4516     | 24                         | 35                         |
| hsa-miR-92a-3p  | 900                        | 415                        | hsa-miR-339-5p    | 64                         | 74                         | hsa-miR-320d     | 24                         | 29                         |
| hsa-miR-342-3p  | 854                        | 485                        | hsa-miR-6727-5p   | 64                         | 43                         | hsa-miR-940      | 24                         | 29                         |
| hsa-miR-486-5p  | 770                        | 800                        | hsa-miR-3135b     | 62                         | 58                         | hsa-miR-30c-5p   | 24                         | 28                         |
| hsa-miR-191-5p  | 717                        | 441                        | hsa-miR-423-3p    | 60                         | 24                         | hsa-miR-2110     | 24                         |                            |
| hsa-miR-142-5p  | 616                        | 280                        | hsa-miR-15b-5p    | 59                         | 38                         | hsa-miR-1268a    | 24                         |                            |
| hsa-miR-26b-5p  | 546                        | 258                        | hsa-miR-636       | 58                         | 39                         | hsa-miR-222-3p   | 24                         |                            |
| hsa-miR-3960    | 423                        | 396                        | hsa-miR-4787-5p   | 57                         | 24                         | hsa-miR-3152-5p  | 23                         | 51                         |
| hsa-miR-29a-3p  | 289                        | 96                         | hsa-miR-4800-3p   | 56                         | 38                         | hsa-miR-92b-3p   | 23                         | 26                         |
| hsa-miR-146a-5p | 284                        | 212                        | hsa-miR-1246      | 55                         | 54                         | hsa-miR-128-2-5p | 23                         | 25                         |
| hsa-miR-3656    | 282                        | 178                        | hsa-miR-6087      | 55                         | 41                         | hsa-miR-1181     | 23                         |                            |
| hsa-miR-30d-5p  | 281                        | 183                        | hsa-miR-151a-3p   | 52                         | 28                         | hsa-miR-125b-5p  | 23                         |                            |
| hsa-miR-155-5p  | 277                        | 90                         | hsa-miR-28-3p     | 50                         |                            | hsa-miR-4322     | 21                         | 20                         |
| hsa-miR-1915-3p | 276                        | 281                        | hsa-miR-4784      | 48                         | 93                         | hsa-miR-1307-3p  | 21                         |                            |
| hsa-miR-140-3p  | 269                        | 148                        | hsa-miR-223-5p    | 47                         | 60                         | hsa-miR-128-3p   | 20                         |                            |
| hsa-miR-21-5p   | 258                        | 106                        | hsa-miR-221-3p    | 47                         | 45                         | hsa-miR-505-5p   | 20                         |                            |
| hsa-miR-4301    | 246                        | 74                         | hsa-miR-16-2-3p   | 46                         | 47                         | hsa-miR-106b-3p  | 20                         |                            |
| hsa-miR-486-3p  | 245                        | 226                        | hsa-miR-451a      | 46                         | 40                         | hsa-miR-3915     |                            | 108                        |
| hsa-miR-125a-5p | 231                        | 198                        | hsa-miR-7704      | 46                         | 23                         | hsa-miR-138-2-3p |                            | 67                         |
| hsa-miR-103a-3p | 206                        | 67                         | hsa-miR-6089      | 45                         | 52                         | hsa-miR-370-3p   |                            | 62                         |
| hsa-miR-25-3p   | 192                        | 63                         | hsa-miR-4649-5p   | 45                         | 25                         | hsa-miR-3180-5p  |                            | 47                         |
| hsa-miR-4532    | 188                        | 134                        | hsa-miR-107       | 44                         | 43                         | hsa-miR-212-5p   |                            | 46                         |
| hsa-miR-126-3p  | 186                        | 226                        | hsa-miR-3141      | 41                         | 62                         | hsa-miR-4730     |                            | 43                         |
| hsa-miR-361-3p  | 180                        | 45                         | hsa-miR-4492      | 41                         | 39                         | hsa-miR-27a-3p   |                            | 40                         |
| hsa-miR-320a    | 163                        | 83                         | hsa-miR-3615      | 40                         | 47                         | hsa-miR-6756-3p  |                            | 37                         |
| hsa-miR-320c    | 134                        | 102                        | hsa-miR-361-5p    | 39                         | 24                         | hsa-miR-518b     |                            | 33                         |
| hsa-miR-23a-3p  | 133                        | 75                         | hsa-miR-941       | 39                         |                            | hsa-miR-4707-5p  |                            | 32                         |
| hsa-miR-6789-5p | 127                        | 155                        | hsa-miR-6724-5p   | 38                         | 27                         | hsa-miR-625-5p   |                            | 31                         |
| hsa-miR-148a-3p | 117                        | 64                         | hsa-miR-199a-3p   | 37                         | 30                         | hsa-miR-3200-3p  |                            | 30                         |
| hsa-miR-1343-5p | 117                        | 27                         | hsa-miR-26a-2-3p  | 35                         |                            | hsa-miR-1178-3p  |                            | 29                         |
| hsa-miR-425-5p  | 113                        | 110                        | hsa-miR-4734      | 34                         | 30                         | hsa-miR-1260b    |                            | 29                         |
| hsa-miR-181a-5p | 110                        | 65                         | hsa-miR-4515      | 34                         | 27                         | hsa-miR-8072     |                            | 29                         |
| hsa-miR-6752-3p | 109                        | 71                         | hsa-miR-148b-3p   | 34                         | 20                         | hsa-miR-8069     |                            | 28                         |
| hsa-miR-93-5p   | 103                        | 35                         | hsa-miR-4792      | 32                         | 61                         | hsa-miR-6758-3p  |                            | 27                         |
| hsa-miR-6126    | 93                         | 45                         | hsa-miR-4632-5p   | 32                         | 30                         | hsa-miR-6090     |                            | 27                         |
| hsa-miR-29b-3p  | 93                         | 38                         | hsa-miR-143-3p    | 32                         |                            | hsa-miR-1294     |                            | 27                         |
| hsa-miR-4488    | 90                         | 75                         | hsa-miR-328-3p    | 29                         |                            | hsa-miR-4286     |                            | 26                         |
| hsa-miR-103b    | 82                         | 23                         | hsa-miR-744-5p    | 28                         |                            | hsa-miR-6733-3p  |                            | 26                         |
| hsa-miR-29c-3p  | 80                         | 36                         | hsa-miR-181a-2-3p | 28                         |                            | hsa-miR-197-3p   |                            | 25                         |
| hsa-miR-101-3p  | 78                         | 29                         | hsa-miR-200c-3p   | 28                         |                            | hsa-miR-635      |                            | 25                         |
| hsa-miR-195-5p  | 77                         | 49                         | hsa-miR-4785      | 27                         | 31                         | hsa-miR-4650-5p  |                            | 25                         |
| hsa-miR-30e-5p  | 76                         |                            | hsa-miR-98-5p     | 27                         | 26                         | hsa-miR-6805-3p  |                            | 24                         |
| hsa-miR-342-5p  | 75                         | 53                         | hsa-miR-6746-3p   | 27                         |                            | hsa-miR-4789-3p  |                            | 24                         |

| <b>miRNA</b>    | <b>60 Gy <math>\gamma</math> irradiation</b> | <b>60 Gy electron irradiation</b> |
|-----------------|----------------------------------------------|-----------------------------------|
| hsa-miR-4661-5p |                                              | 23                                |
| hsa-miR-186-5p  |                                              | 22                                |
| hsa-miR-6770-3p |                                              | 22                                |
| hsa-miR-150-3p  |                                              | 21                                |
| hsa-miR-6081    |                                              | 21                                |
| hsa-miR-6720-3p |                                              | 21                                |
| hsa-miR-6812-5p |                                              | 21                                |
| hsa-miR-3664-5p |                                              | 21                                |
| hsa-miR-218-5p  |                                              | 21                                |
| hsa-miR-23b-3p  |                                              | 20                                |
| hsa-miR-718     |                                              | 20                                |
| hsa-miR-3195    |                                              | 20                                |
| hsa-miR-27a-5p  |                                              | 20                                |
| hsa-miR-4720-5p |                                              | 20                                |
| hsa-miR-6803-3p |                                              | 20                                |

**Table S2. Functional annotations of the most abundant microRNAs in the EVs of  $\gamma$ - and electron-irradiated PBMCs.** Most relevant functions were highlighted in green.

| Term                               | Count | Percent    | Fold        | P-value  | Bonferroni | FDR     | miRNA                                                                                                                 |
|------------------------------------|-------|------------|-------------|----------|------------|---------|-----------------------------------------------------------------------------------------------------------------------|
| Immune Response                    | 9     | 0.09782609 | 10.22570332 | 3,13E-08 | 1.57e-5    | 6.19e-6 | hsa-mir-92a-1,hsa-mir-486-1,hsa-mir-16-2,hsa-mir-16-1,hsa-mir-92a-2,hsa-mir-150,hsa-mir-486-2,hsa-mir-342,hsa-mir-223 |
| Latent Virus Replication           | 5     | 0.29411765 | 30.74394464 | 2,44E-07 | 1.22e-4    | 2.71e-5 | hsa-mir-223,hsa-mir-92a-1,hsa-mir-26a-1,hsa-mir-26a-2,hsa-mir-92a-2                                                   |
| Hematopoiesis                      | 7     | 0.12280702 | 12.8369453  | 3,65E-07 | 1.83e-4    | 3.09e-5 | hsa-mir-486-2,hsa-mir-92a-1,hsa-mir-486-1,hsa-mir-223,hsa-mir-142,hsa-mir-92a-2,hsa-mir-150                           |
| Cholesterol Metabolism             | 4     | 0.5        | 52.26470588 | 3,93E-07 | 1.97e-4    | 3.17e-5 | hsa-mir-486-2,hsa-mir-92a-1,hsa-mir-486-1,hsa-mir-92a-2                                                               |
| Aging                              | 7     | 0.11111111 | 11.61437908 | 7,41E-07 | 3.71e-4    | 4.70e-5 | hsa-mir-92a-1,hsa-mir-16-1,hsa-mir-16-2,hsa-mir-26a-1,hsa-mir-223,hsa-mir-26a-2,hsa-mir-92a-2                         |
| Angiogenesis                       | 7     | 0.10769231 | 11.25701357 | 9,23E-07 | 4.62e-4    | 5.46e-5 | hsa-mir-486-2,hsa-mir-92a-1,hsa-mir-486-1,hsa-mir-16-1,hsa-mir-16-2,hsa-mir-92a-2,hsa-mir-150                         |
| Circadian Rhythm                   | 5     | 0.22727273 | 23.75668449 | 1,01E-06 | 5.05e-4    | 5.78e-5 | hsa-mir-16-1,hsa-mir-191,hsa-mir-16-2,hsa-mir-26a-1,hsa-mir-26a-2                                                     |
| Ovarian Follicle Development       | 3     | 0.75       | 78.39705882 | 2,90E-06 | 1.45e-3    | 1.23e-4 | hsa-mir-26a-2,hsa-mir-26b,hsa-mir-26a-1                                                                               |
| Cell Cycle                         | 7     | 0.08433735 | 8.81573352  | 5,02E-06 | 2.51e-3    | 1.90e-4 | hsa-mir-92a-1,hsa-mir-16-1,hsa-mir-191,hsa-mir-16-2,hsa-mir-223,hsa-mir-150,hsa-mir-92a-2                             |
| Toxicity                           | 5     | 0.13888889 | 14.51797386 | 1,33E-05 | 6.67e-3    | 4.01e-4 | hsa-mir-16-1,hsa-mir-16-2,hsa-mir-26a-1,hsa-mir-26a-2,hsa-mir-150                                                     |
| Neurotoxicity                      | 4     | 0.2        | 20.90588235 | 2,53E-05 | 0.0127     | 6.17e-4 | hsa-mir-16-2,hsa-mir-92a-1,hsa-mir-92a-2,hsa-mir-16-1                                                                 |
| Regulation of Akt Pathway          | 4     | 0.15384615 | 16.08144796 | 7,55E-05 | 0.0378     | 1.58e-3 | hsa-mir-92a-1,hsa-mir-26a-1,hsa-mir-26a-2,hsa-mir-92a-2                                                               |
| Hormone-mediated Signaling Pathway | 5     | 0.0862069  | 9.01115619  | 1,43E-04 | 0.0715     | 2.64e-3 | hsa-mir-92a-1,hsa-mir-16-1,hsa-mir-16-2,hsa-mir-223,hsa-mir-92a-2                                                     |
| Tumor Suppressor MiRNAs            | 5     | 0.07692308 | 8.04072398  | 2,47E-04 | 0.1238     | 4.10e-3 | hsa-mir-26b,hsa-mir-16-1,hsa-mir-16-2,hsa-mir-26a-1,hsa-mir-26a-2                                                     |
| Onco-MiRNAs                        | 4     | 0.10810811 | 11.30047695 | 3,12E-04 | 0.1565     | 4.55e-3 | hsa-mir-92a-1,hsa-mir-191,hsa-mir-92a-2,hsa-mir-150                                                                   |
| T-Cell Differentiation             | 3     | 0.1875     | 19.59926471 | 3,78E-04 | 0.1892     | 5.32e-3 | hsa-mir-16-1,hsa-mir-16-2,hsa-mir-150                                                                                 |
| Innate Immunity                    | 4     | 0.0952381  | 9.95518207  | 5,14E-04 | 0.2575     | 6.52e-3 | hsa-mir-26a-1,hsa-mir-223,hsa-mir-142,hsa-mir-26a-2                                                                   |
| Cell Proliferation                 | 5     | 0.0625     | 6.53308824  | 6,59E-04 | 0.3304     | 8.03e-3 | hsa-mir-92a-1,hsa-mir-16-1,hsa-mir-16-2,hsa-mir-92a-2,hsa-mir-150                                                     |

|                                      |   |            |             |          |        |         |                                                                 |
|--------------------------------------|---|------------|-------------|----------|--------|---------|-----------------------------------------------------------------|
| Adipogenesis                         | 3 | 0.15       | 15.67941176 | 7,51E-04 | 0.376  | 8.95e-3 | hsa-mir-26b,hsa-mir-26a-1,hsa-mir-26a-2                         |
| Epithelial-to-Mesenchymal Transition | 5 | 0.06024096 | 6.29695252  | 7,83E-04 | 0.3921 | 9.27e-3 | hsa-mir-486-2,hsa-mir-26b,hsa-mir-486-1,hsa-mir-191,hsa-mir-223 |
| Skeletal Muscle Cell Differentiation | 3 | 0.13636364 | 14.2540107  | 1,00E-03 | 0.502  | 0.0108  | hsa-mir-26b,hsa-mir-26a-1,hsa-mir-26a-2                         |
| Chemosensitivity Of Tumor Cells      | 2 | 0.25       | 26.13235294 | 2,33E-03 | 1      | 0.0218  | hsa-mir-16-1,hsa-mir-16-2                                       |
| Embryonic Stem Cell Differentiation  | 3 | 0.09677419 | 10.11574953 | 2,77E-03 | 1      | 0.0253  | hsa-mir-92a-1,hsa-mir-223,hsa-mir-92a-2                         |
| Cell Death                           | 4 | 0.05128205 | 5.36048265  | 5,29E-03 | 1      | 0.0437  | hsa-mir-92a-1,hsa-mir-16-1,hsa-mir-16-2,hsa-mir-92a-2           |
| Adipocyte Differentiation            | 3 | 0.07317073 | 7.64849354  | 6,20E-03 | 1      | 0.0489  | hsa-mir-26b,hsa-mir-92a-1,hsa-mir-92a-2                         |
| Lipid Metabolism                     | 3 | 0.06666667 | 6.96862745  | 8,05E-03 | 1      | 0.0601  | hsa-mir-423,hsa-mir-92a-1,hsa-mir-92a-2                         |
| Cholesterol Efflux                   | 2 | 0.13333333 | 13.9372549  | 8,41E-03 | 1      | 0.0625  | hsa-mir-486-2,hsa-mir-486-1                                     |
| Chondrocyte Development              | 2 | 0.13333333 | 13.9372549  | 8,41E-03 | 1      | 0.0625  | hsa-mir-92a-1,hsa-mir-92a-2                                     |
| DNA Damage Response                  | 2 | 0.125      | 13.06617647 | 9,56E-03 | 1      | 0.069   | hsa-mir-16-2,hsa-mir-16-1                                       |
| Cell Division                        | 2 | 0.11764706 | 12.29757785 | 0,0108   | 1      | 0.0757  | hsa-mir-16-2,hsa-mir-16-1                                       |
| Cardiotoxicity                       | 2 | 0.11764706 | 12.29757785 | 0,0108   | 1      | 0.0757  | hsa-mir-486-2,hsa-mir-486-1                                     |
| Cell Differentiation                 | 3 | 0.05357143 | 5.59978992  | 0,0147   | 1      | 0.0984  | hsa-mir-16-1,hsa-mir-16-2,hsa-mir-150                           |
| Immune System(Xiao's Cell2010)       | 2 | 0.0952381  | 9.95518207  | 0,0163   | 1      | 0.1074  | hsa-mir-223,hsa-mir-150                                         |
| Cytokine Secretion                   | 1 | 0.5        | 52.26470588 | 0,019    | 1      | 0.1209  | hsa-mir-150                                                     |
| Endothelial Cell Apoptosis           | 1 | 0.5        | 52.26470588 | 0,019    | 1      | 0.1209  | hsa-mir-223                                                     |
| Tumor Cell Radiation Sensitivity     | 1 | 0.33333333 | 34.84313725 | 0,0284   | 1      | 0.1605  | hsa-mir-223                                                     |
| Bone Regeneration                    | 2 | 0.06666667 | 6.96862745  | 0,032    | 1      | 0.1714  | hsa-mir-92a-1,hsa-mir-92a-2                                     |
| Regulation of Stem Cell              | 3 | 0.03797468 | 3.96947133  | 0,0367   | 1      | 0.1933  | hsa-mir-26b,hsa-mir-223,hsa-mir-142                             |

**Table S3. Calibration data of the  $\gamma$ -irradiator.** Settings as well as calculated and measured values of dosimetry.

|                                    |             |
|------------------------------------|-------------|
| irradiator                         | IBL 437     |
| configured value                   | 30 Gy       |
| irradiation period                 | 336 seconds |
| mean irradiation temperature       | 24.3 °C     |
| calculated dose in center          | 31.56 Gy    |
| measured dose in center            | 30.90 Gy    |
| deviation                          | 2.1%        |
| dose rate according to calculation | 5.63 Gy/min |
| dose rate according to measurement | 5.52 Gy/min |

**Table S4. Dosimetry results of the  $\gamma$ -irradiator.** Values indicate measured values at certain positions within the cylinder at a set value of 30 Gy.

measured doses (Gy)

|                              |     | distance from rotation axis (mm) |      |      |      |      |
|------------------------------|-----|----------------------------------|------|------|------|------|
|                              |     | 0                                | 20   | 40   | 50   | 57   |
| distance from bottom<br>(mm) | 280 | 24.1                             | 27.2 | 28.2 | 30.4 | 32.2 |
|                              | 260 | 27.9                             | 28.6 | 30.8 | 33.8 | 35.3 |
|                              | 230 | 31.3                             | 31.6 | 34.6 | 36.6 | 38.8 |
|                              | 150 | 30.9                             | 31.7 | 33.2 | 34.3 | 37.3 |
|                              | 70  | 30.2                             | 32.1 | 33.8 | 36.8 | 38   |
|                              | 40  | 27.2                             | 28.8 | 32.4 | 34.4 | 35.5 |
|                              | 20  | 26.3                             | 26.9 | 27.7 | 31   | 31.8 |

For dosimetry, the  $\gamma$ -irradiator was set to emit a dose of 30 Gy in 336 seconds. The deviation from the measured values and the configured value is 2.1 %, which lies within the range of measuring errors. Therefore, no adjustments or corrective measures of the irradiator were required.
